# Supplementary material
Source: PubMed Central journal article supplement (PMC5614444)

Conservation implications of limited genetic diversity and population structure in Tasmanian devils (*Sarcophilus harrisii*)

Conservation Genetics

Sarah Hendricks<sup>1</sup>, Brendan Epstein<sup>2</sup>, Barbara Schönfeld<sup>3</sup>, Cody Wiench<sup>1</sup>, Rodrigo Hamede<sup>3</sup>, Menna Jones<sup>3</sup>, Andrew Storfer<sup>2</sup> and Paul Hohenlohe<sup>1\*</sup>

<sup>1</sup>Institute for Bioinformatics and Evolutionary Studies, Department of Biological Sciences, University of Idaho, 875 Perimeter Dr., Moscow, Idaho 83844-3051, USA

<sup>2</sup>School of Biological Sciences, Washington State University, Pullman, WA 99164-4236, USA

<sup>3</sup>School of Zoology, University of Tasmania, Private Bag 5, Hobart 7001, AUSTRALIA

\*Author for correspondence: hohenlohe@uidaho.edu

Electronic Supplementary Material

**Table S1** Data per site including the latitude and longitude of each location, the number of samples collected per site, the year samples were collected, and the year of first detection of disease (or absence of disease)

| LOCATION ID | LOCATION          | LATITUDE | LONGITUDE | # OF SAMPLES PER LOCATION | YEARS THE SAMPLES WERE COLLECTED | APPROXIMATE DATE OF DISEASE OUTBREAK |
|-------------|-------------------|----------|-----------|---------------------------|----------------------------------|--------------------------------------|
| 1           | Mt William        | -40.886  | 148.190   | 2                         | 2008                             | <1996                                |
| 2           | St Helens         | -41.340  | 148.170   | 1                         | 2006                             | <1996                                |
| 3           | St Marys          | -41.544  | 148.117   | 2                         | 2006                             | <1996                                |
| 4           | Blessington       | -41.473  | 147.457   | 2                         | 2005                             | 2003                                 |
| 5           | Freycinet         | -42.220  | 148.310   | 2                         | 1999                             | 2001                                 |
| 6           | Little Swanport   | -42.290  | 147.910   | 1                         | 1999                             | 1999                                 |
| 7           | Buckland          | -42.430  | 147.772   | 2                         | 2006                             | 1999                                 |
| 8           | Pawleena          | -42.690  | 147.610   | 2                         | 1999                             | 2003                                 |
| 9           | Kellevie          | -42.740  | 147.800   | 2                         | 1998                             | 2003                                 |
| 10          | Forestier         | -42.897  | 147.906   | 2                         | 2004                             | 2006                                 |
| 11          | Bothwell          | -42.330  | 147.000   | 2                         | 2008                             | 2004                                 |
| 12          | Elderslie         | -42.526  | 147.042   | 2                         | 2008                             | 2004                                 |
| 13          | Fentonbury        | -42.621  | 146.790   | 2                         | 2004                             | 2004                                 |
| 14          | Lonnvale          | -42.928  | 146.792   | 1                         | 2004                             | 2004                                 |
| 15          | Glen Huon         | -42.988  | 146.802   | 2                         | 2008                             | 2004                                 |
| 16          | Hastings Caves    | -43.479  | 146.905   | 1                         | 2005                             | 2006                                 |
| 17          | Reedy Marsh       | -42.750  | 146.287   | 2                         | 2007                             | 2004                                 |
| 18          | Bronte Park       | -42.096  | 146.441   | 2                         | 2004                             | 2004                                 |
| 19          | Lake Rowallan     | -41.766  | 146.166   | 2                         | 2004                             | 2004                                 |
| 20          | Wisedale          | -41.294  | 146.671   | 2                         | 2006                             | 2004                                 |
| 21          | Harford           | -41.260  | 146.590   | 1                         | 2006                             | 2003                                 |
| 22          | Narawntapu        | -41.220  | 146.640   | 2                         | 1999                             | 2007                                 |
| 23          | Mt Housetop       | -41.268  | 145.874   | 2                         | 2007                             | 2005                                 |
| 24          | West Pencil Pine  | -41.517  | 145.767   | 2                         | 2006 & 2007                      | 2006                                 |
| 25          | Takone            | -41.195  | 145.592   | 2                         | 2007                             | 2010                                 |
| 26          | Mt Hicks          | -41.019  | 145.658   | 1                         | 2007                             | 2011                                 |
| 27          | Flowerdale        | -41.107  | 145.499   | 2                         | 2009                             | 2012                                 |
| 28          | Peegra Dip Falls  | -41.030  | 145.460   | 2                         | 2009                             | 2013                                 |
| 29          | Milkshake Hills   | -41.109  | 145.188   | 2                         | 2004                             | 2013                                 |
| 30          | Woolnorth         | -40.693  | 144.710   | 2                         | 2006                             | No disease                           |
| 31          | Arthur River      | -40.992  | 144.672   | 2                         | 2007                             | No disease                           |
| 32          | Savage River      | -41.651  | 145.079   | 2                         | 2007                             | No disease                           |
| 33          | Granville Harbour | -41.794  | 145.066   | 2                         | 2004                             | 2015                                 |
| 34          | Queenstown North  | -41.941  | 145.459   | 2                         | 2007                             | 2014                                 |
| 35          | Mt Arrowsmith     | -42.165  | 145.927   | 2                         | 2004 & 2005                      | 2005                                 |
| 36          | Queenstown South  | -42.166  | 145.547   | 2                         | 2007                             | No disease                           |
| 37          | Strahan           | -41.170  | 145.450   | 2                         | 2008                             | No disease                           |
| 38          | Macquarie Heads   | -42.393  | 145.232   | 2                         | 2006                             | No disease                           |

**Table S2** The number of SNPs discovered per chromosome

| Chromosome | # of SNPs |
|------------|-----------|
| 1          | 1419      |
| 2          | 1485      |
| 3          | 1228      |
| 4          | 924       |
| 5          | 636       |
| 6          | 666       |
| Unknown    | 4         |

**Table S3** The harvested results of STRUCTURE analyses. Using the Evanno method, K = 2 (in bold) was the optimal number of clusters

| K        | Reps      | Mean LnP(K)         | Stdev LnP(K)  | Ln'(K)              | Ln''(K)            | Delta K            |
|----------|-----------|---------------------|---------------|---------------------|--------------------|--------------------|
| 1        | 20        | -234254.8500        | 13.6578       | NA                  | NA                 | NA                 |
| <b>2</b> | <b>20</b> | <b>-220483.4000</b> | <b>4.6169</b> | <b>13771.450000</b> | <b>8820.500000</b> | <b>1910.479989</b> |
| 3        | 20        | -215532.4500        | 3.0266        | 4950.950000         | 2853.470000        | 942.785941         |
| 4        | 20        | -213434.9700        | 235.0678      | 2097.480000         | 15949.040000       | 67.848677          |
| 5        | 20        | -227286.5300        | 26674.4181    | -13851.560000       | 20719.135000       | 0.776742           |
| 6        | 20        | -220418.9550        | 23029.3639    | 6867.575000         | 3436.580000        | 0.149226           |
| 7        | 20        | -210114.8000        | 166.3816      | 10304.155000        | 9570.520000        | 57.521497          |
| 8        | 20        | -209381.1650        | 154.7725      | 733.635000          | 304.065000         | 1.964594           |
| 9        | 20        | -208951.5950        | 296.2365      | 429.570000          | 864.250000         | 2.917433           |
| 10       | 20        | -209386.2750        | 940.3062      | -434.680000         | NA                 | NA                 |

**Figure S1** Genetic distance (Rousset's) across all SNPs vs. log10-transformed geographic distance, showing the Mantel test best-fit line. There was no significant relationship between geographic and genetic distance (Mantel  $r = 0.002179$ ;  $p = 0.48$ )

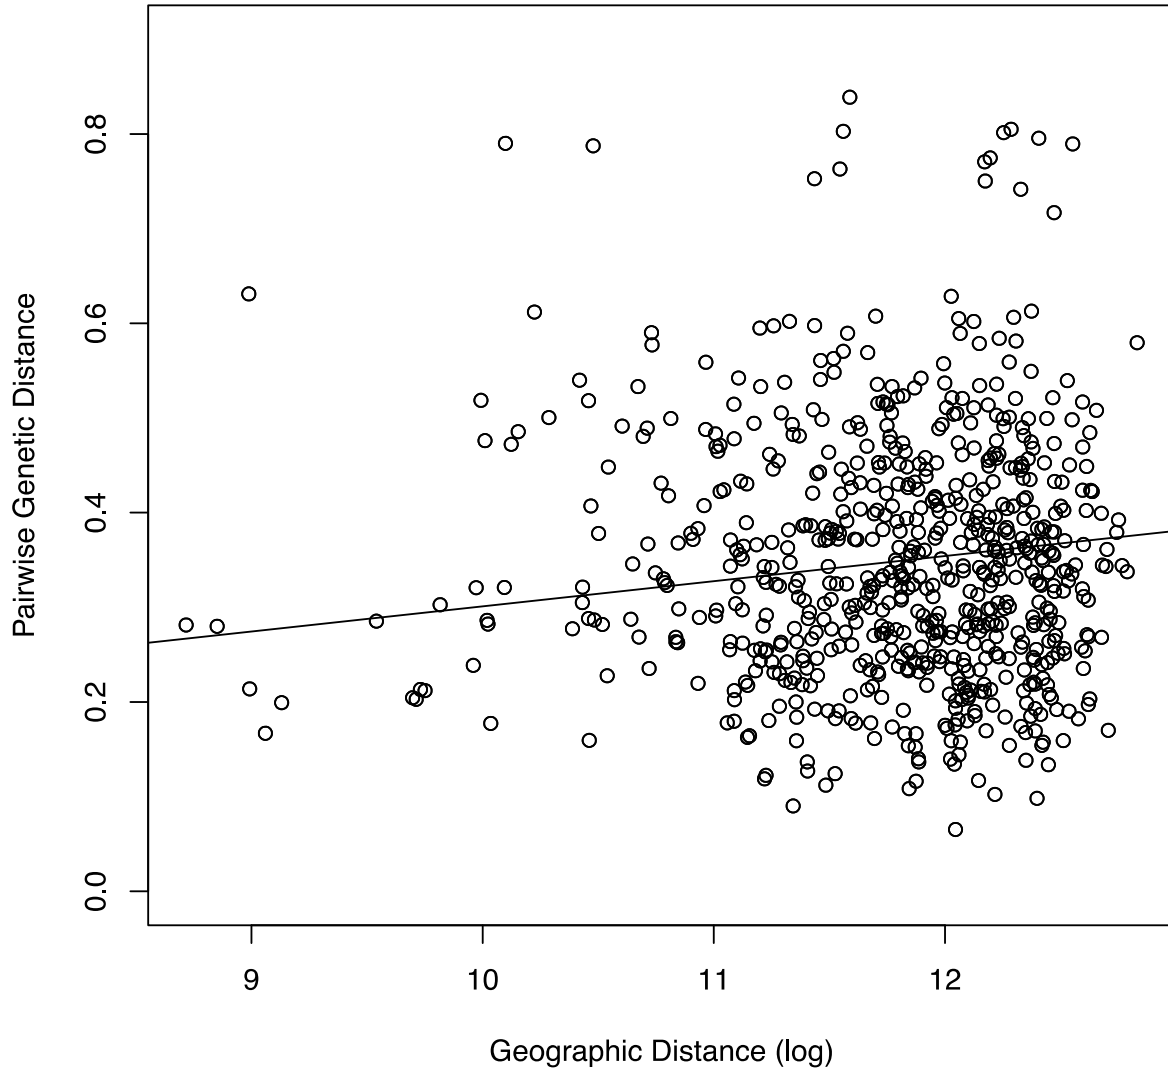

Supplement: NIHMS850532-supplement-10592_2017_939_MOESM1_ESM.pdf [file NIHMS850532-supplement-10592_2017_939_MOESM1_ESM.pdf]
